# Supplementary material
Source: PubMed Central journal article supplement (PMC6055511)
Supplement: NIHMS974770-supplement-1.pdf [file NIHMS974770-supplement-1.pdf]

1 **Supporting Information**

2 **Figure S1. *LACK/LACK* and *LACK/- L. major* cultures show comparable percentages of live**  
3 **cells at 35°C.** The indicated parasite lines were incubated for four days at 35°C then diluted 1 in  
4 10 and enumerated by hemocytometer under phase-contrast illumination. After normalizing for  
5 cell density, equal numbers of parasites were stained with FDA then FDA-positive cells were  
6 counted by fluorescence microscopy, as described in Experimental Procedures.

7  
8 **Figure S2. Identified peptides matching the sequence of LmCOX4, as predicted by *L. major***  
9 **orf LmjF.12.0670.** Mass spectrometric identification of matching LmCOX4 peptides (single  
10 letter amino acid designation) isolated from the 2D-DIGE analysis protein spot highlighted in  
11 Fig. 1. High-confidence peptides are indicated in blue, underlined. Modest-confidence peptides  
12 are indicated in red, underlined (see Experimental Procedures for definitions).

13  
14 **Figure S3. Sequence alignment of LmCOX4 with its trypanosomatid orthologs.** A. Amino  
15 acid sequence alignments for LmCOX4, *L. major* COX4; LdCOX4, *L. donovani* COX4;  
16 LbCOX4, *L. brasiliensis* COX4; TbCOX4, *Trypanosoma brucei* COX4 (COIV); TcCOX4,  
17 *Trypanosoma cruzi* COX4. Asterisks, colons and periods denote identical, strongly similar and  
18 weakly similar residues, respectively. B. Table showing overall percentage identities between  
19 trypanosomatid COX4 orthologs. C. Phylogenetic tree indicating relative relatedness of the  
20 trypanosomatid COX4 orthologs. These analyses were performed using the Clustal Omega  
21 online sequence analysis program (<http://www.ebi.ac.uk/Tools/msa/clustalo/>) with default  
22 parameters.

23

24 **Table S1. Total number of 2D-DIGE protein spots detected and analysed.** Data from each of  
25 the four gels, representing the experimental replicates, are shown. Spots were excluded from the  
26 analysis if the spot was outside the area of interest, the spot was not a protein (i.e.dust specks), or  
27 the spot was not consistently resolved.

28

Figure S1

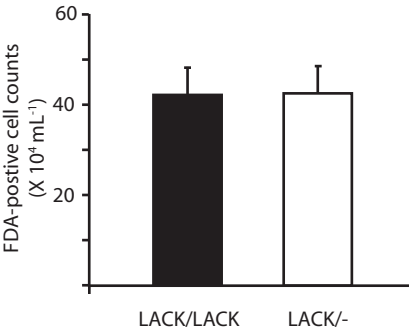

Figure S2

mltrravssavgaamvtsssvsmqrrydhdrwyghaleldthnykfnggeppswmktrakTEEETSFAKsvl 71  
phidfassyecllfdadrLNTNLNREFGNEIKyrlekqantvarAQQLLRdkkagtgpdækVENTLIAR 142  
ifdeehvqaemkyvkcirANELAEDNRLDILPGGSPNSLRektrwnlnthelhpadrAEIGARLTAWLPEKY 213  
hivyfddfqtvaandatarKEMLEIVESVQKeytaeakEGGYESDLKEAVAEMDDVDPTRTITMEAIKsc 284  
kdlqgledwsrqvheyngddrIIAIYARaaeitknvehqalvraqmrewrkLATKNESKl 343

Figure S3

A

```

LmCOX4 MLTRRAVSSAVGAA-----MV-TSSSVSMQRRYDHRWYGHAELELDTHN
LdCOX4 MFTRRSVSAAVGAA-----MA-TSSSLSMQRRYDHRWYGHAELELDTHN
LbCOX4 MFTRRAVSSALGAA-----AVAMSSLSVQRRYDHRWYGHAELELDTHN
TbCOX4 MFARRSLIATVAAATATKPTSSAAQSNANGTGATQSTLLQRRYDHRWYGHAELELDSHN
TcCOX4 MLSRRSLTAA-----FAAMTKQPLMQRRHDHRWYGHAELELDSHN
*::**:: : : .. : ***:*****:***

LmCOX4 YKFNGEPPSWMKTRAKTEEETSFAKSVLPHIDFASSYECLLFDADRLNTNLNRKEFGNEI
LdCOX4 YKFNGEPPSWMKTHAKTEEETSFAKSVLPHIDFASSYECLLFDADRLNTNLNRKEFGNEI
LbCOX4 YKFNGEPPSWMKARAKTEEETNFSAKSVLPHIDFASSYECLLFDADRLNTHLNRKEFGNEI
TbCOX4 YKFTGEPSSWMRVRETEEETNFSAKSVLPHVDFASSYECLLFDADRLNGTLNRKEFGNEV
TcCOX4 YKFTGEPSSWMRQRETEEETAFAKSVLPHVDFASSYECLLFDADRLNGHLNRKEFGNEV
***.*****: : :***** *****:*****:*****:*****:

LmCOX4 KYRLEKQANTVARAQQLLRDKKAGTGPDAEKVENTLIARIFDEEHVQAEMKYVKCIRANE
LdCOX4 KYRLEKQANTVARAQQLLRDKKAGTGPDAEKVENTLIARIFDEEHVQAEMKYVKCIRANE
LbCOX4 KYRLEKQANTVARAQQLLDRKAGTGPDAEKSENALIARVDFDEEHVQAEMKYVKCIRANE
TbCOX4 RFRLEKQSNNTVARAQQLLKDGRAGG---DERVENAMIARIFDEEHVQAEMRYVKCIRANE
TcCOX4 TFRLEKQSNNTVARAQQMLKEKKSSS---DERLENTMIARIFDEEHVQAEMKYVKCIRANE
:*****:*****:***: : : * : **::***:*****:*****:

LmCOX4 LAEDNRLDILPGGSPNSLREKTRWNLNTELHPADRAEIGARLTAWLPEKYHIVYFDDFQT
LdCOX4 LAEDNRLDILPGGSPNSLREKTRWNLNTELHPADRAEIGARLTAWLPEKYHIVYFDDFQT
LbCOX4 LAEDNRLDILPGGSPNSLREKTRWNLNTELHPADRAEIGARLTAWLPEKYHIVYFDDFQT
TbCOX4 LAEDNRLDILPGGSPNSLREKTRWNVNTELHPADRAEIASRLTAWLPEKYHIVYVDDFQT
TcCOX4 LAEDNRLDILPGGSPNSLREKTRWNVNTELHPADRAEIGARLTAWLPEKYHIVYFDDFQT
*****:*****:*****:*****:*****:*****:*****:*****:

LmCOX4 VAANDATARKEMLIVESVQKEYTAEAKEGGYESDLKEAVAEMLDDVDPTRTITMEAIKS
LdCOX4 VAANDATARKEMLIVESVQKEYTAEAKECGYENDLKETVAEMLDDVDPTRTITMEAIKS
LbCOX4 VAANDTTARREMLIVESVRKEYTAEAKEGGYESDLRETVAEMLDDVDPTRAITMEAIKG
TbCOX4 VAANDSCARDAMLRIVEGVSKEYEAEARSSGYERDLREVVQELLDDVDP SRHITSEAIKA
TcCOX4 VAANDPSARREMLNIVQVVEREYADEAKSSGYEKDLKEVVNELLDDVDP SRHITSEAIKA
***** ** **.**: * :** *: . ** **:*.* *:*****:* ** *****.

LmCOX4 CKDLQQLEDWSRVVHEYNGDDRI IAIYARAAEITKNVEHQALVRQMREWRKLATKNESKL
LdCOX4 CKDLQQLEDWSRVVHEYNGDDRI IEIYARAAEITKNAEHQALVRQMREWRKLATKNESRL
LbCOX4 CSNLQQLEDWSHQVHEYNGDHR I IEIYARAAEITKNAEHQELVKQMREWRKLATRN----
TbCOX4 ATDLTQLEEWSRVVHEYNGDER I LD IYSRAAELTRNEEHKKLVEDMRQWKLSNKI----
TcCOX4 CTDLNQLEEWSRVVHEYNGDDRI LD IYARAAELTKNADHQALVKNMKEWRKLANKI----
..:* **:**: *****.**: **:**:**:* :*: **:**:**:*:

```

B

|        | LmCOX4 | LdCOX4 | LbCOX4 | TbCOX4 | TcCOX4 |
|--------|--------|--------|--------|--------|--------|
| LmCOX4 | 100.00 | 96.50  | 90.86  | 75.30  | 78.01  |
| LdCOX4 | 96.50  | 100.00 | 90.56  | 76.19  | 78.92  |
| LbCOX4 | 90.86  | 90.56  | 100.00 | 75.37  | 76.88  |
| TbCOX4 | 75.30  | 76.19  | 75.37  | 100.00 | 82.04  |
| TcCOX4 | 78.01  | 78.92  | 76.88  | 82.04  | 100.00 |

C

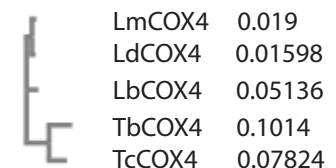

Table S1

| <b>2D-DIGE Gel ID</b> | <b>Total Spots Detected</b> | <b>Spots included in Analysis</b> |
|-----------------------|-----------------------------|-----------------------------------|
| Gel 1                 | 2324                        | 448                               |
| Gel 2                 | 2215                        | 607                               |
| Gel 3                 | 2168                        | 350                               |
| Gel 4                 | 2431                        | 667                               |
